# Supplementary material
Source: publisher site journal article supplement (https://www.dovepress.com/get_supplementary_file.php?f=251451.docx)
Supplement: Supplementary file 1 [file get_supplementary_file.php]

# Supplementary Table

Augmented results for photoscreening comparison of 2WIN in Kaleidos protective case (K) and GoCheck Kids iPhone 7+ with flash concentrating case (G). Each device has a primary instrument referral criteria (Krefer and Grefer) as well as one more sensitive (Ksens and Gsens) and one more specific (Kspec and Gspec) used to construct the ROC curve in figure 3. GCK can be interpreted “on-site” by the smartphone program, or with central expert interpretation (central). Validation table includes screening refer (screen +), screening pass (screen -) and inconclusive screen (screen i) compared to confirmatory exam target found (exam+) or sub-threshold confirmatory exam (exam -). The exam cut offs are defined by non-age-stratified AAPOS uniform guidelines published in 2003 (2003 AAPOS), age-stratified published in 2013 (2013 AAPOS), or 2013 with all older patients added to the older triad of 2013 guidelines (2013+). Screening tools also compared to amblyopia defined as visual acuity 20/40 or worse, or two inter-eye lines of difference plus amblyopia risk factors. Conventional validation with inconclusive results omitted (2 x 2) and primary validation when inconclusives all regarded as refer (i=r). The instrument referral criteria are listed as hyperopia (hyper), myopia (myop), astigmatism (cyl) and anisometropia (aniso). Separate cohorts include low-prevalence Burma patients and high prevalence Alaska patients and a combined (n=162) group.

| K = Kaleidos + 2WIN | | |  |  |  | exam+ | exam - |  |  |  |  |  |  |  |  |  |  |  |  |
| --- | --- | --- | --- | --- | --- | --- | --- | --- | --- | --- | --- | --- | --- | --- | --- | --- | --- | --- | --- |
| G = GoCheckKids iPhone7+ flash-concentrated | | | | | | A | B | screen + | srefer | |  |  |  |  |  |  |  |  |  |
| central = expert internet interpretation | | | | | | C | D | screen - | pass | |  |  | 2 x 2 | | |  | i = r | | |
| onsite = local smart phone interpretation | | | | | | E | F | screen i | inconclusive | |  |  | 2003 AAPOS | | | | | | |
| spec | group | hyper | myop | cyl | aniso | A | B | C | D | E | F |  | sens. | spec. | PPV |  | sens. | spec. | PPV |
| Ksens | all | 2 | -1.75 | 1.3 | 1 | 65 | 19 | 6 | 56 | 1 | 15 |  | 92% | 75% | 77% |  | 92% | 62% | 66% |
| Krefer | all | 2.1 | -2 | 1.5 | 1.26 | 62 | 12 | 9 | 63 | 1 | 15 |  | 87% | 84% | 84% |  | 88% | 70% | 70% |
| Kspec | all | 2.25 | -3 | 2 | 1.75 | 52 | 1 | 19 | 74 | 1 | 15 |  | 73% | 99% | 98% |  | 74% | 82% | 77% |
|  |  |  |  |  |  |  |  |  |  |  |  |  |  |  |  |  |  |  |  |
| Gsens | all | 1.75 | -3.2 | 0.8 | 0.6 | 54 | 12 | 15 | 75 | 3 | 3 |  | 78% | 86% | 82% |  | 79% | 83% | 79% |
| Grefer | all | 1.9 | -3.4 | 1 | 0.8 | 44 | 9 | 25 | 78 | 3 | 3 |  | 64% | 90% | 83% |  | 65% | 87% | 80% |
| Gspec | all | 2 | -4 | 1.5 | 1 | 40 | 3 | 29 | 84 | 3 | 3 |  | 58% | 97% | 93% |  | 60% | 93% | 88% |
| g-central | all |  |  |  |  | 59 | 28 | 10 | 59 | 3 | 3 |  | 86% | 68% | 68% |  | 86% | 66% | 67% |
| g-onsite | all |  |  |  |  | 51 | 26 | 18 | 61 | 3 | 3 |  | 74% | 70% | 66% |  | 75% | 68% | 65% |
|  |  |  |  |  |  |  |  |  |  |  |  |  |  |  |  |  |  |  |  |
| K-refer | Burma | 2.1 | -2 | 1.5 | 1.26 | 2 | 1 | 2 | 30 | 0 | 13 |  | 50% | 97% | 67% |  | 50% | 68% | 13% |
| G-refr | n=48 | 1.9 | -3.4 | 1 | 0.8 | 1 | 5 | 2 | 38 | 1 | 1 |  | 33% | 88% | 17% |  | 50% | 86% | 25% |
| G central | Burma |  |  |  |  | 3 | 16 | 0 | 27 | 1 | 1 |  | 100% | 63% | 16% |  | 100% | 61% | 19% |
|  |  |  |  |  |  |  |  |  |  |  |  |  |  |  |  |  |  |  |  |
| Krefer | Alaska | 2.1 | -2 | 1.5 | 1.26 | 60 | 11 | 7 | 33 | 1 | 2 |  | 90% | 75% | 85% |  | 90% | 72% | 82% |
| Grefer | n=114 | 1.9 | -3.4 | 1 | 0.8 | 43 | 4 | 23 | 40 | 2 | 2 |  | 65% | 91% | 91% |  | 66% | 87% | 88% |
| Gcentral | Alaska |  |  |  |  | 56 | 12 | 10 | 33 | 2 | 1 |  | 85% | 73% | 82% |  | 85% | 87% | 88% |
|  |  |  |  |  |  |  |  |  |  |  |  |  | 2013 AAPOS | | | | | | |
| K 2013 | all 2013 | 2.3 | -4 | 2.3 | 2 | 14 | 1 | 6 | 26 | 0 | 3 |  | 70% | 96% | 93% |  | 70% | 87% | 78% |
| G 2013 | n=50 | 2.3 | -4 | 1.3s | 1 | 10 | 3 | 9 | 26 | 1 | 1 |  | 53% | 90% | 77% |  | 55% | 87% | 73% |
|  |  |  |  |  |  |  |  |  |  |  |  |  | "2013+" AAPOS | | | | | | |
| Krefer | all | 2.1 | -2 | 1.5 | 1.26 | 55 | 19 | 11 | 61 | 2 | 14 |  | 83% | 76% | 74% |  | 84% | 65% | 63% |
| Grefer | n=162 | 1.9 | -3.4 | 1 | 0.8 | 40 | 13 | 25 | 78 | 3 | 3 |  | 62% | 86% | 75% |  | 63% | 83% | 73% |
| Gcentral |  |  |  |  |  | 47 | 30 | 18 | 61 | 3 | 3 |  | 72% | 67% | 61% |  | 74% | 65% | 60% |
|  |  |  |  |  |  |  |  |  |  |  |  |  | amblyopia | | | | | | |
| Krefer | all | 2.1 | -2 | 1.5 | 1.26 | 33 | 41 | 2 | 70 | 1 | 15 |  | 94% | 63% | 45% |  | 94% | 56% | 38% |
| Grefer | n=162 | 1.9 | -3.4 | 1 | 0.8 | 31 | 23 | 4 | 98 | 1 | 5 |  | 89% | 81% | 57% |  | 89% | 78% | 53% |
| Gcentral |  |  |  |  |  | 28 | 49 | 8 | 71 | 1 | 5 |  | 78% | 59% | 36% |  | 78% | 57% | 35% |
